# Supplementary material for: Low Concentration of Exogenous Carbon Monoxide Modulates Radiation-Induced Bystander Effect in Mammalian Cell Cluster Model
Source: Int J Mol Sci. 2016 Dec 8;17(12):2051. doi: 10.3390/ijms17122051 (PMC5187851; doi:10.3390/ijms17122051)
Supplement: Supplementary file 1 [file ijms-17-02051-s001.pdf]

# Supplementary Materials: Low Concentration of Exogenous Carbon Monoxide Modulates Radiation-Induced Bystander Effect in Mammalian Cell Cluster Model

Wenqing Wu, Lili Nie, K. N. Yu, Lijun Wu, Peizhong Kong, Lingzhi Bao, Guodong Chen, Haoran Yang and Wei Han

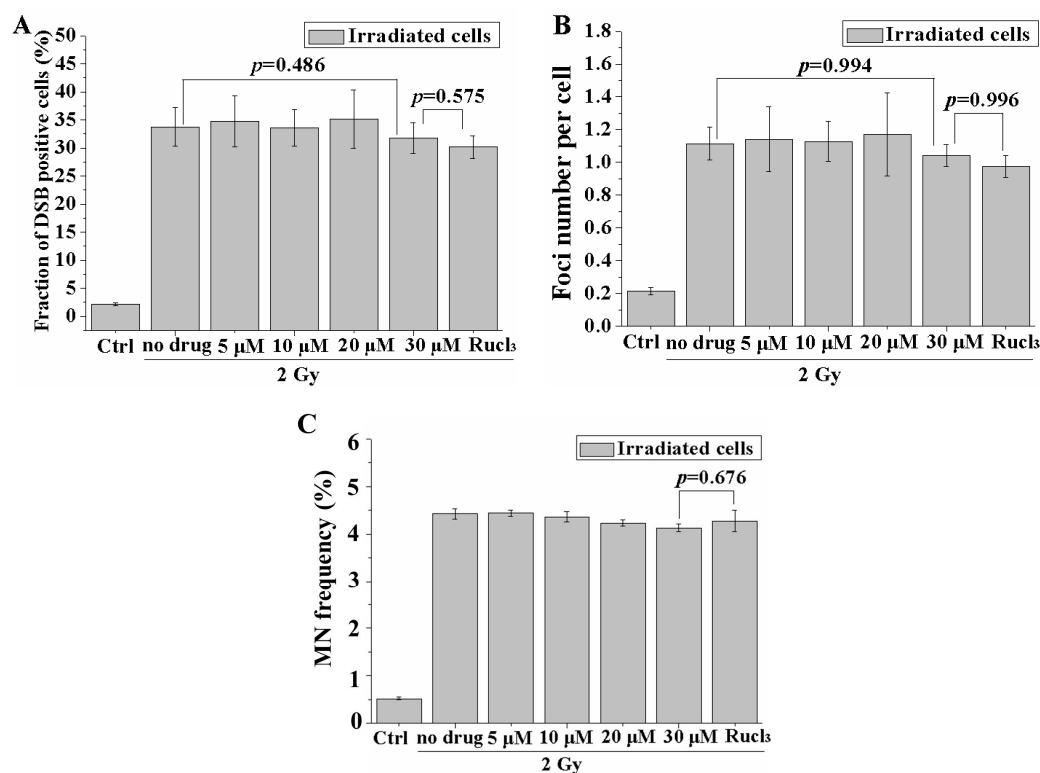

**Figure S1.** CO did not affect DSB formation in the irradiated cells. Fraction of p53BP1 positive cells (A); foci number per cell (B); and MN frequency (C) in the irradiated cells with or without CO (CORM-2) treatment. Data are pooled from at least 3 independent repeats and the results are presented as mean  $\pm$  SD. Significances in the differences between the samples are determined and differences with  $p < 0.05$  are considered statistically significant.

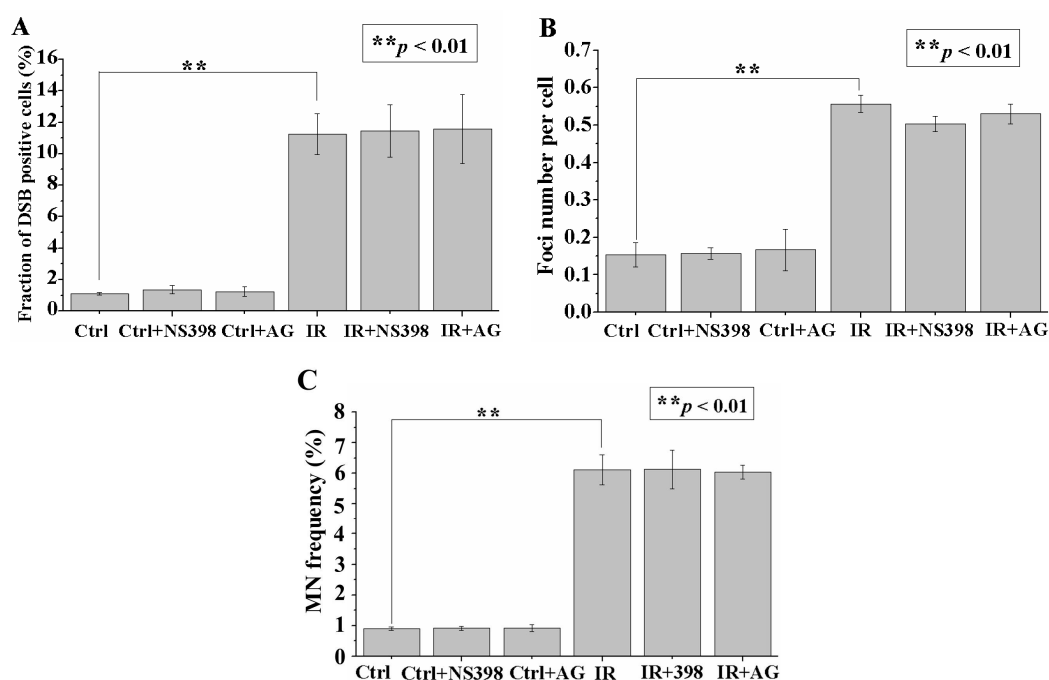

**Figure S2.** NS 398 or AG did not affect DSB and MN formation in the irradiated cells. Fraction of p53BP1 positive cells (A); foci number per cell (B); and MN frequency (C) in the irradiated cells with or without NS 398 (50  $\mu$ M) or AG (1 mM) treatment. Data are pooled from at least 3 independent repeats and the results are presented as mean  $\pm$  SD. Significances in the differences between the samples are determined and differences with  $p < 0.05$  are considered statistically significant.

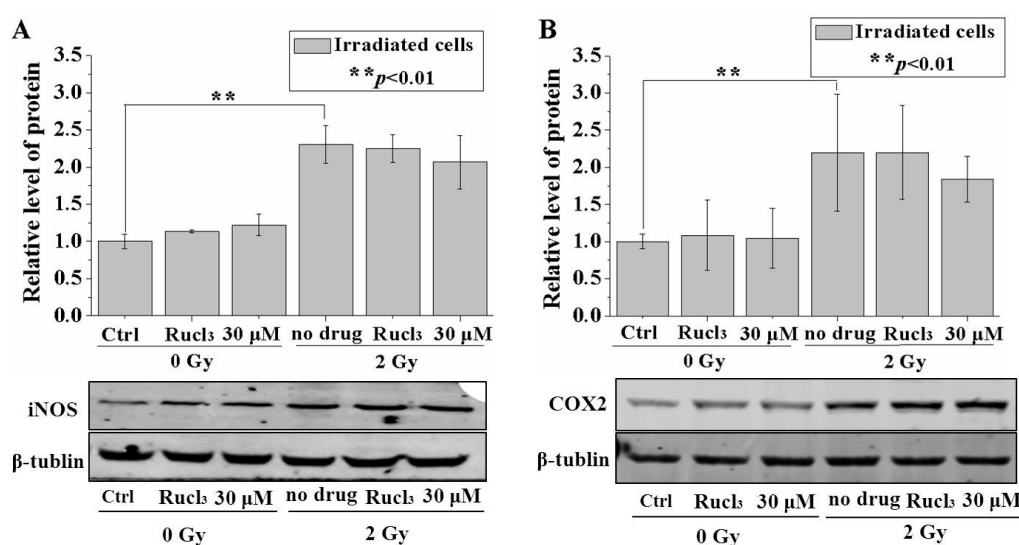

**Figure S3.** CO did not affect the expression of iNOS or COX-2 in the irradiated cells. Relative level of iNOS (A); and COX-2 (B) protein expression in irradiated cells with or without CO (CORM-2) treatment. Data are pooled from at least 3 independent repeats and the results are presented as mean  $\pm$  SD. Significances in the differences between the samples are determined and differences with  $p < 0.05$  are considered statistically significant.
